# Supplementary material for: Estimated Exposure to 6 Potentially Hepatotoxic Botanicals in US Adults
Source: PubMed Central journal article supplement (PMC11301549; doi:10.1001/jamanetworkopen.2024.25822), 2024-08-05
Supplement: jamanetwopen-e2425822-s001.pdf [file jamanetwopen-e2425822-s001.pdf]

## Supplementary Online Content

Likhitsup A, Chen VL, Fontana RJ, et al. Estimated exposure to 6 potentially hepatotoxic botanicals in US adults. *JAMA Netw Open*. 2024;7(8):e2425822.  
doi:10.1001/jamanetworkopen.2024.25822

**eTable 1.** Ingredient Identification Number and Supplement Identification Number Identified the 6 Potential Hepatotoxic Botanical Products

**eTable 2.** Botanical Products by Name (Alphabetical)

**eFigure.** Herbal and Dietary Supplement Use Among U.S. Adults Enrolled in NHANES 2017-2020

This supplementary material has been provided by the authors to give readers additional information about their work.

**eTable 1. Ingredient Identification Number and Supplement Identification Number Identified the 6 Potential Hepatotoxic Botanical Products**

|                          | Ingredient identification number                                                                                                                                                                                                                                                                                     | supplement identification number                                                                                                                                                                                                                                                                                                                                                                                                                                                                                                                                                                                                                                                                                                                 |
|--------------------------|----------------------------------------------------------------------------------------------------------------------------------------------------------------------------------------------------------------------------------------------------------------------------------------------------------------------|--------------------------------------------------------------------------------------------------------------------------------------------------------------------------------------------------------------------------------------------------------------------------------------------------------------------------------------------------------------------------------------------------------------------------------------------------------------------------------------------------------------------------------------------------------------------------------------------------------------------------------------------------------------------------------------------------------------------------------------------------|
| Turmeric/Curcumin        | 10000454, 10000469, 10000481, 10000629, 1001307, 10002733, 10002959, 10003127, 10003219, 10004382, 10004581, 10005542, 10006720, 10007731, 10008191, 10008201, 10008216, 10008966, 10009076, 10009077, 10009475, 100009519, 10009996, 10010066, 10010815, 10011115, 10011136, 10011464, 10011624, 10011723, 10011909 | 17816, 17982, 17984, 18001, 18020, 18049, 18169, 18259, 18325, 18348, 18395, 18400, 18414, 18442, 18443, 18449, 18486, 18516, 18519, 18533, 18593, 18594, 18674, 18686, 18716, 18724, 18788, 18807, 18842, 18862, 18867, 18885, 18907, 18912, 18914, 18940, 18978, 18982, 19025, 19041, 19086, 19126, 19195, 19203, 19206, 19571, 19597, 19602, 19671, 19674, 19679, 19685, 19687, 19721, 19749, 19752, 19753, 19777, 19784, 19795, 19818, 19828, 19834, 19866, 19871, 19875, 19876, 19877, 19978, 19998, 20013, 20015, 20117, 20140, 200143, 20174, 20188, 20225, 20226, 20319, 20321, 20335, 20405, 20446, 20447, 20462, 20478, 20530, 20533, 20588, 20591, 20604, 20674, 20680, 20683, 20713, 20720, 20722, 20731, 20744, 20745, 20858, 20901 |
| Green Tea Extract        | 10000086, 10000449, 10000516, 10000784, 10001082, 10001288, 10001148, 10002453, 10002775, 10002851, 10002916, 10002955, 10003209, 10003275, 10003447, 10003748, 10003767, 10003877, 10004001, 10006474, 10006582, 10006586, 10006742, 10006705, 10007604, 10007605, 10008119, 10009948, 10010818                     | 15365, 15383, 16480, 17769, 17783, 17789, 17875, 18020, 18043, 18073, 18163, 18359, 18466, 18518, 18545, 18832, 18856, 18868, 18877, 18882, 18919, 18955, 19036, 19179, 19196, 19199, 19366, 19422, 19460, 19462, 19504, 19536, 19674, 19713, 19777, 19824, 19834, 19870, 19873, 19884, 19966, 19972, 19981, 19983, 20151, 20173, 20225, 20319, 20325, 20335, 20364, 20408, 20540, 20601, 20690, 20702, 20714, 20722, 20725, 20755, 20901                                                                                                                                                                                                                                                                                                        |
| <i>Garcinia cambogia</i> | 10000654, 10000697, 10001092, 10002458, 10006459, 10006527, 10010332, 10010834, 10011071, 10011493                                                                                                                                                                                                                   | 17832, 17955, 19180, 19667, 19674, 19733, 20009, 20400, 20634                                                                                                                                                                                                                                                                                                                                                                                                                                                                                                                                                                                                                                                                                    |
| Black Cohosh             | 10000043, 10000044, 10000445, 10000764, 10000897, 10001062, 10002264, 10002267, 10002535, 10004682, 10006540, 10007474, 10007475, 10008239, 10010821, 10011444                                                                                                                                                       | 17897, 18104, 18180, 18506, 19418, 20266, 20305, 20364                                                                                                                                                                                                                                                                                                                                                                                                                                                                                                                                                                                                                                                                                           |
| Red Yeast Rice           | 10004356                                                                                                                                                                                                                                                                                                             | 6750, 8490, 19712, 20291                                                                                                                                                                                                                                                                                                                                                                                                                                                                                                                                                                                                                                                                                                                         |
| Ashwagandha              | 10001370, 10002263, 10003249, 1004021, 10004587, 10006560, 10006683, 10007285, 10008775, 10010377, 10010805, 10010836, 10011073, 10011732                                                                                                                                                                            | 17819, 18012, 18025, 18079, 18458, 18600, 18718, 18779, 19070, 19072, 19176, 19354, 19537, 19997, 20033, 20089, 20175, 20181, 20225, 20293, 20340, 20432, 20435, 20467, 20562, 20581, 20651, 20841                                                                                                                                                                                                                                                                                                                                                                                                                                                                                                                                               |

**eTable 2. Botanical Products by Name (Alphabetical)**

| TURMERIC/CURCUMIN                                                                                                   |
|---------------------------------------------------------------------------------------------------------------------|
| ANDREW LESSMAN PROCAPS LIVER ANTI-OXIDANT EXTRACTS MILK THISTLE (SILYMARIN) TURMERIC (CURCUMIN) ARTICHOKE           |
| ANIMAL PAK THE TRUE ORIGINAL THE ULTIMATE TRAINING PACK                                                             |
| ASQUARED NUTRITION TURMERIC CURCUMIN WITH BIOPERINE 95% CURCUMINOIDS 1300 MG 100% NATURAL                           |
| BEYOND RAW RAW ELEMENTS A.M./P.M. VITAPAK                                                                           |
| BOTANIC CHOICE ESSENTIALS TURMERIC 500 MG.                                                                          |
| CUR-Q10 ULTRA HIGH ANTIOXIDANT CURCUMIN COQ10 COMPLEX                                                               |
| CVS HEALTH TURMERIC COMPLEX 500 MG WITH BLACK PEPPER                                                                |
| CVS HEALTH TURMERIC CURCUMIN 500 MG                                                                                 |
| DEFAULT CURCUMIN                                                                                                    |
| DEFAULT TURMERIC                                                                                                    |
| DOCTOR'S BEST HIGH ABSORPTION CURCUMIN FROM TURMERIC ROOT WITH CURCUMIN C3 COMPLEX AND BIOPERINE 500 MG             |
| FINEST NUTRITION TURMERIC 450 MG PER CAPSULE ONE PER DAY                                                            |
| FINEST NUTRITION TURMERIC 500 MG PER CAPSULE                                                                        |
| FINEVINE TURMERIC CURCUMIN WITH GINGER AND BIOPERINE BLACK PEPPER                                                   |
| GAIA HERBS CURCUMIN SYNERGY TURMERIC SUPREME EXTRA STRENGTH                                                         |
| GAIA HERBS TURMERIC SUPREME EXTRA STRENGTH                                                                          |
| GARDEN OF LIFE DR. FORMULATED ENZYMES ORGANIC DIGEST+ 29 ORGANIC FRUITS & VEGGIES+ 120,000 UNITS OF PAPAINE CHEWA.. |
| GARDEN OF LIFE MYKIND ORGANICS CERTIFIED ORGANIC WHOLE FOOD HAIR, SKIN & NAILS ORGANIC PLANT COLLAGEN BUILDER WH..  |
| GNC AMP ADVANCED MUSCLE PERFORMANCE MEN'S STRENGTH VITAPAK PROGRAM INCLUDES CLINICALLY STUDIED MULTIVITAMIN BLEND   |
| GNC HERBAL PLUS TURMERIC CURCUMIN 500 MG VEGETARIAN STANDARDIZED EXTRACT                                            |
| GNC MEGA MEN 50 PLUS CLINICALLY STUDIED MULTIVITAMIN TIMED-RELEASE NEW! SMALLER PILLS                               |
| GNC MEGA MEN 50 PLUS VITAPAK PROGRAM WITH CLINICALLY STUDIED MULTIVITAMIN                                           |
| GNC MEGA MEN CLINICALLY STUDIED MULTIVITAMIN TIMED-RELEASE                                                          |
| GNC MEGA MEN ENERGY & METABOLISM CLINICALLY STUDIED MULTIVITAMIN TIMED-RELEASE NEW! SMALLER PILLS                   |
| GNC MEGA MEN ENERGY & METABOLISM VITAPAK PROGRAM WITH CLINICALLY STUDIED MULTIVITAMIN BLEND                         |
| GNC MEGA MEN PERFORMANCE & VITALITY VITAPAK PROGRAM WITH CLINICALLY STUDIED MULTIVITAMIN BLEND                      |
| GNC MEGA MEN SPORT CLINICALLY STUDIED MULTIVITAMIN TIMED-RELEASE NEW! SMALLER PILLS                                 |
| GNC TRIFLEX FAST-ACTING CLINICAL-STRENGTH DOSES OF GLUCOSAMINE/CHONDROITIN & BOSWELLIA PLUS TURMERIC                |
| GNC WOMEN'S ULTRA MEGA 50 PLUS CLINICALLY STUDIED MULTIVITAMIN TIMED-RELEASE NEW! SMALLER PILLS                     |
| GNC WOMEN'S ULTRA MEGA ACTIVE CLINICALLY STUDIED MULTIVITAMIN TIMED-RELEASE NEW! SMALLER PILLS                      |
| GNC WOMEN'S ULTRA MEGA CLINICALLY STUDIED MULTIVITAMIN TIMED-RELEASE                                                |
| GNC WOMEN'S ULTRA MEGA ENERGY & METABOLISM CLINICALLY STUDIED MULTIVITAMIN TIMED-RELEASE NEW! SMALLER PILLS         |
| GNC WOMEN'S ULTRA MEGA WITHOUT IRON & IODINE CLINICALLY STUDIED MULTIVITAMIN TIMED-RELEASE                          |
| HEALTH PLUS KIDNEY CLEANSE 550 MG EACH KEY INGREDIENTS BUCHU LEAF EXTRACT CRANBERRY EXTRACT 50:1 TURMERIC ROOT C..  |

HIMALAYA TURMERIC95 WITH CURCUMIN

IMMUNOTEC OMEGA GEN V OMEGA-3 COQ10 VIT. E CURCUMA PIPERINE

INNOVIX LABS HIGH ABSORPTION CURCUMIN TURMERIC EXTRACT TIME RELEASE FORMULA BIO-ACTIVE EXTRACT OF TURMERIC

INSTAFLEX ADVANCED FEATURING UC-II COLLAGEN

JARROW FORMULAS CURCUMIN 95 TURMERIC EXTRACT 500 MILLIGRAMS

JOINT FORMULA HEALTHY JOINT FORMULA

LIFE EXTENSION SUPER BIO-CURCUMIN 400 MG

LIVEWELL MAXIMUM STRENGTH CURCUWELL HIGH-POTENCY CURCUMIN AND BOSWELLIA BLEND 1300 MG FORMULA INCLUDES BIOPERINE..

LIVINGWELL NUTRACEUTICALS HEAL-N-SOOTHEN SYSTEMIC ENZYME FORMULA

MEGAFOOD TURMERIC STRENGTH FOR WHOLE BODY WITH TURMERIC, BLACK PEPPER & TART CHERRY VITAMIN & HERBAL

METHYL GENETIC NUTRITION BY PROFESSIONAL HEALTH PRODUCTS GLUTAMATE SCAVENGER/ CALMING FORMULA PROVIDES A NATURAL..

MSQUARE OKINAWA TRIPLE TURMERIC+ BLEND OF 3 TURMERIC VARIETALS + WITH BLACK PEPPER 766 MG TURMERIC 100 MG CURCUMIN

NATURE MADE TURMERIC CURCUMIN

NATURE'S BOUNTY STANDARDIZED EXTRACT TURMERIC 500 MG STANDARDIZED TO CONTAIN 93% CURCUMINOIDS

NATURE'S BOUNTY TURMERIC 450 MG PLUS TURMERIC EXTRACT 50 MG STANDARDIZED FOR 95% CURCUMINOIDS

NATURE'S BOUNTY TURMERIC 538 MG STANDARDIZED EXTRACT

NATURE'S NUTRITION TURMERIC & GINGER WITH BIOPERINE 1950 MG W/ BIOPERINE

NATURE'S NUTRITION TURMERIC CURCUMIN WITH BIOPERINE 1950 MG W/ BIOPERINE

NATURE'S TRUTH VITAMINS ADVANCED TURMERIC CURCUMIN COMPLEX 1500 MG PER SERVING PLUS BLACK PEPPER EXTRACT OLIVE L..

NATURE'S WAY STANDARDIZED TURMERIC 95% CURCUMINOIDS

NATURECITY TRUECURCUMIN HIGHLY ABSORBABLE BCM-95

NATUREWISE CURCUMIN MADE WITH ORGANIC CURCUMIN AND 95% CURCUMINOIDS 2250 MG PER SERVING WITH ORGANIC GINGER & BI..

NEW CHAPTER 40+ EVERY WOMAN'S ONE DAILY MULTI WHOLE-FOOD FERMENTED MULTIVITAMIN MADE WITH ORGANIC VEGETABLES AND ..

NEW CHAPTER EVERY MAN MULTIVITAMIN WHOLE-FOOD CULTURED MULTIVITAMIN MADE WITH ORGANIC VEGETABLES AND HERBS

NEW CHAPTER EVERY MAN'S ONE DAILY MULTI COMPLETE WHOLE-FOOD MULTIVITAMIN MADE WITH ORGANIC VEGETABLES & HERBS

NEW CHAPTER EVERY WOMAN'S ONE DAILY MULTI WHOLE-FOOD CULTURED MULTIVITAMIN WITH NUTRIENTS MADE WITH ORGANIC VEGE..

NEWVITALITY RUBY REDS POMEGRANATE, ACAI & MAQUI A DELICIOUS FRUIT AND VEGETABLE WITH POTENT VITAMINS, MINERALS, ..

NOW CURCUMIN SOFTGELS FROM TURMERIC ROOT EXTRACT STANDARDIZED EXTRACT 95% CURCUMINOIDS

NOW LIVER REFRESH

NUTRILITE DOUBLE X 22 VITAMINS AND MINERALS AND 22 PLANT CONCENTRATES 1 PACKET, 2X A DAY

NUTRILITE PERFECT PACK WITH 22 VITAMINS AND MINERALS, AND MORE THAN 22 PLANT CONCENTRATES INCLUDES DOUBLE X 2 PA..

OPTIM NUTRITION TURMERIC PLUS WITH BIO-ABSORB CURCUWIN

OREGON'S WILD HARVEST TURMERIC USDA ORGANIC

ORGANIC INDIA TURMERIC FORMULA

OSTEO BI-FLEX JOINT HEALTH TRIPLE STRENGTH +TURMERIC GLUCOSAMINE TURMERIC WITH JOINT SHIELD 2 PER DAY  
PHYSICIAN'S CHOICE TURMERIC WITH BOSWELLIA, GINGER & BIOPERINE STANDARDIZED 95% CURCUMINOIDS  
PLANTORIGIN TURMERIC CURCUMIN WITH BIOPERINE 1500 MG HIGHEST POTENCY OF 95% CURCUMINOIDS  
PLNT TURMERIC CURCUMA LONGA  
PURE BY NATURE TURMERIC CURCUMIN WITH BLACK PEPPER EXTRACT 1,200 MG TURMERIC PER SERVING  
PURE ENCAPSULATIONS ULTRANUTRIENT WITH METAFOLIN L-5-MTHF; MULTIVITAMIN/MINERAL FORMULA WITH ENHANCED SUPPORT  
PURITAN'S PRIDE TURMERIC 400 MG NATURAL WHOLE HERB  
PURITAN'S PRIDE TURMERIC 800 MG NATURALLY CONTAINS CURCUMIN NATURAL WHOLE HERB  
PURITAN'S PRIDE TURMERIC CURCUMIN 500 MG WITH 50 MG OF TURMERIC EXTRACT STANDARDIZED TO CONTAIN 95% CURCUMINOIDE..  
QUNOL EXTRA STRENGTH TURMERIC CURCUMIN COMPLEX ULTRA HIGH ABSORPTION 1000 MG  
RADIANCE TURMERIC 400 MG  
RAINBOW LIGHT ADVANCED ENZYME SYSTEM RAPID RELEASE FORMULA PLANT-SOURCE ENZYMES & SOOTHING HERBS  
REAL HEALTH PROSTATE COMPLETE MULTI-ACTION FORMULA ONE-PER-DAY NATURAL BIOACTIVE SOURCE OF BETA SITOSTEROL  
REXALL NATURALIST TURMERIC CURCUMIN 500 MG WITH 50 MG OF TURMERIC EXTRACT STANDARDIZED TO CONTAIN 95% CURCUMINOIDS  
ROOT2 TURMERIC EXTRACT CURCUMIN C3 COMPLEX 1,160 MG PER SERVING WITH BIOPERINE  
SCHWARTZ BIORESEARCH PREMIUM ULTRA PURE TURMERIC CURCUMIN WITH BIOPERINE 1500 MG 95% STANDARDIZED CURCUMINOIDS  
SCIENCE NATURAL SUPPLEMENTS TURMERIC WITH BIOPERINE 1300 MG TURMERIC EXTRACT PER SERVING MAX ABSORPTION  
SMARTER NUTRITION CURCUMIN 95% TETRA-HYDRO CURCUMINOIDS  
SOLGAR FULL SPECTRUM CURCUMIN  
SOURCE NATURALS LIFE FORCE MULTIPLE  
SPRING VALLEY STANDARDIZED EXTRACT TURMERIC CURCUMIN 500 MG PER CAPSULE WITH 50 MG GINGER POWDER  
SPRING VALLEY STANDARDIZED TURMERIC CURCUMIN COMPLEX  
SPRING VALLEY SUPERIOR BIOAVAILABILITY STANDARDIZED TURMERIC CURCUMIN COMPLEX WITH CURCUWIN 550 MG PER SERVING  
SPRING VALLEY WHOLE HERB TURMERIC CURCUMIN 500 MG PER CAPSULE  
STARLIGHT LIFEGUARD JOINT FORMULA  
SUNDOWN NATURALIST TURMERIC CURCUMIN 500 MG WITH 50 MG OF TURMERIC EXTRACT STANDARDIZED TO CONTAIN 95% CURCUMINO..  
SWANSON PREMIUM BRAND TURMERIC 720 MG  
SYNERGY THERACURMIN TURMERIC EXTRACT 300 MG  
THE VITAMIN SHOPPE TURMERIC EXTRACT 300 MG 95% CURCUMINOIDS  
THE VITAMIN SHOPPE TURMERIC WITH CURCUMIN 500 MG 95% CURCUMINOIDS  
TNVITAMINS TURMERIC CURCUMIN 500 MG WITH BLACK PEPPER EXTRACT  
TRADER JOE'S TURMERIC STANDARDIZED EXTRACT  
TRUE HEALTH DR. CUTLER'S LIVER & KIDNEY CLEANSE  
TURMERIC 500 MG UP&UP  
UPWELLNESS GOLDEN REVIVE+ ADVANCED FORMULA

VIBRANT HEALTH MAXIMUM VIBRANCE CONTAINS ALL KNOWN NUTRIENTS PLANT-BASED MULTI CLINICALLY FORMULATED VERSION 3..  
VIBRANT HEALTH MAXIMUM VIBRANCE CONTAINS ALL KNOWN NUTRIENTS PLANT-BASED MULTI- ADVANCED DAILY FUTUREFOOD CLINIC..  
VIMERSON HEALTH TURMERIC & GINGER BIOPERINE  
VIMERSON HEALTH TURMERIC CURCUMIN BIOPERINE  
VIMERSON HEALTH TURMERIC CURCUMIN MADE WITH ORGANIC TURMERIC POWDER  
VITABREEZE GLUCOSAMINE CHONDROITIN MSM & TURMERIC TRIPLE STRENGTH FORMULA  
VITALITY WORKS 100% VEGETARIAN TURMERIC PLUS PM ACHE RELIEF  
VITAMIN WORLD TURMERIC CURCUMIN CURCUMA LONGA 500 MG WITH 50 MG OF TURMERIC EXTRACT STANDARDIZED TO CONTAIN 95% ..  
WALGREENS TURMERIC 500 MG  
WHOLE FOODS MARKET FOOD-CULTURED MEN'S +40 MULTI A ONE TABLET DAILY FOOD-CULTURED FORMULA WITH TARGETED HERBS & ..  
WINDMILL NATURAL VITAMINS BLUEPRINT STANDARDIZED HERBALS TURMERIC 95% CURCUMINOIDS  
YOUTHEORY 1,000 MG TURMERIC EXTRA STRENGTH FORMULA 1,000 MG PER DAILY SERVING  
YOUTHEORY TURMERIC  
ZENITH LABS LONGEVITY ACTIVATOR WITH RESVERATROL DOCTOR FORMULATED  
ZENWISE HEALTH DAILY DIGESTIVE ENZYMES WITH PREBIOTICS + PROBIOTICS + PLANT-SOURCED BLEND

#### GREEN TEA

ADVOCARE COREPLEX MULTIPLE VITAMIN AND MINERAL 36 VITAMINS, MINERALS & NUTRIENTS  
ADVOCARE MNS 3 METABOLIC NUTRITION SYSTEM ENERGY CONTROL WELLNESS MULTINUTRIENT TRIM  
AIM PROANCYNOL 2000 ANTIOXIDANTS WITH GRAPE SEED EXTRACT AIM THE AIM COMPANIES  
ANDREW LESSMAN PROCAPS ULTIMATE EYE SUPPORT 12 MG LUTEIN 6 MG ZEAXANTHIN HIGH ANTHOCYANIN BILBERRY AND ELDERBE..  
ANDREW LESSMAN PROCAPS ULTIMATE WOMEN'S WELLNESS  
ANIMAL PAK THE TRUE ORIGINAL THE ULTIMATE TRAINING PACK  
BLUE STAR NUTRACEUTICALS BLADE  
BODY FORTRESS SUPER ADVANCED SHRED IGNITER L-LEUCINE L-CARNITINE B-COMPLEX GREEN TEA EXTRACT  
BONE & BODY FACTORS CALCIUM-MAGNESIUM INTENSIVE CARE AND MORE PROCAPS LABORATORIES  
BOTANIC CHOICE ESSENTIALS GREEN TEA EXTRACT 500 MG.  
CRI NATURALS CELLULAR RESEARCH INSTITUTE PROSTALEAF (HERBAL FORMULA)  
DEFAULT GREEN TEA  
DEFAULT GREENS POWDER  
DESIGNS FOR HEALTH FEMGUARD + BALANCE  
DOUGLAS COOPER CO. ULTRA OPTICAL CARE 10 MG LUTEIN  
ELEMENTAL HEALTH SCIENCES ULTRA-STRENGTH KETOLEAN7 RASPBERRY KETONES CONJUGATED LINOLEIC ACID L-CARNITINE-L-TART..  
ESTROVEN MAXIMUM STRENGTH + ENERGY DRUG FREE & ESTROGEN FREE  
EVLUTION NUTRITION LEANMODE STIMULANT FREE FAT BURNER  
EVLUTION NUTRITION TRANS4ORM ENERGIZED WEIGHT LOSS SUPPORT

GNC MEGA MEN 50 PLUS VITAPAK PROGRAM WITH CLINICALLY STUDIED MULTIVITAMIN

GNC MEGA MEN ENERGY & METABOLISM VITAPAK PROGRAM WITH CLINICALLY STUDIED MULTIVITAMIN BLEND  
GNC MULTIVITAMIN ULTRA MEGA GOLD NUTRIENT-DENSE MULTIVITAMIN, MINERAL AND ANTIOXIDANT FORMULA  
TIMED RELEASE

GNC WOMEN'S HAIR, SKIN & NAILS FORMULA 3,000 MCG OF BIOTIN ANTIOXIDANTS

GNC WOMEN'S ULTRA MEGA ACTIVE CLINICALLY STUDIED MULTIVITAMIN TIMED-RELEASE NEW! SMALLER PILLS  
GNC WOMEN'S ULTRA MEGA BONE DENSITY CLINICALLY STUDIED MULTIVITAMIN WITH 2,000 IU OF VITAMIN D-3 1,000  
MG OF CAL..

GNC WOMEN'S ULTRA MEGA CLINICALLY STUDIED MULTIVITAMIN TIMED-RELEASE  
GREEN FOODS MATCHA GREEN TEA ENERGY BLEND CEREMONIAL GRADE FARM-DIRECT, WHOLE-LEAF AND SHADE-  
GROWN  
GREEN TEA FAT BURNER LIQUID SOFT-GEL CONCENTRATED EXTRACT MAXIMUM STRENGTH 400 MG EGCG HIGHLY  
CONCENTRATED EGCG

IRWIN NATURALS PROSTA-STRONG SAW PALMETTO PLUS LYCOPENE & PUMPKIN SEED EXTRACT

JOINT FORMULA HEALTHY JOINT FORMULA

KETOLABS CORE BASICS MULTI-VITAMIN-MINERAL  
LIFE EXTENSION MEGA GREEN TEA EXTRACT 98% POLYPHENOLS LIGHTLY CAFFEINATED ONE-PER-DAY CONCENTRATED  
POLYPHENOL EX..  
MEGAFOOD MULTI FOR WOMEN 55+ DOCTOR FORMULATED TIERAONA LOW DOG, M.D. WITH BROWN RICE, CARROTS,  
BROCCOLI & ORANG..  
MEGAFOOD MULTI FOR WOMEN 55+ DOCTOR TIERAONA LOW DOG, M.D. FORMULATED WITH BROWN RICE, CARROTS,  
BROCCOLI & ORANG..

MELALEUCA PROVEXCV  
NATURE MADE DAILY DIABETES HEALTH PACK SCIENTIFICALLY FORMULATED FOR PEOPLE WITH PREDIABETES &  
DIABETES MULTIVIT..

NESTED NATURALS VEGAN OMEGA-3

NEWVITALITY ROYAL GREENS ORIGINAL BLEND  
NEWVITALITY RUBY REDS POMEGRANATE, ACAI & MAQUI A DELICIOUS FRUIT AND VEGETABLE WITH POTENT VITAMINS,  
MINERALS, ..

NORTHSTAR NUTRITIONALS RESTORE FX

NOW CLINICAL STRENGTH PROSTATE HEALTH CLINICAL STRENGTH SAW PALMETTO, BETA-SITOSTEROL & LYCOPENE  
NOW EVE SUPERIOR WOMEN'S MULTI SOFTGELS WITH EVENING PRIMROSE, CRANBERRY, GREEN TEA, HORSETAIL SILICA  
& COQ10  
NOW SPORTS MEN'S EXTREME SPORTS MULTI WITH FREE-FORM AMINO ACIDS, ZMA, TRIBULUS, MCT OIL, HERBAL  
EXTRACTS AND MO..

NUTRACRAFT HAIRXCEL VITAMIN, MINERAL AND HERBAL COMPLEX CONTAINS BIOTIN, FOLIC ACID AND SILICA

NUTRILITE CHOLESTEROL HEALTH CONTAINS GREEN TEA 2 SOFTGELS, 1X A DAY

ORTHO MOLECULAR PRODUCTS MITOCORE

PHYTAGELABS TINNITUS 911 EAR RINGING RELIEF FORMULA

PRO-COR LABS MULTI FORCE FOR MEN

PURE ENCAPSULATIONS POLYPHENOL NUTRIENTS MULTIVITAMIN/MINERAL FORMULA WITH ADDED POLYPHENOLS  
PURITAN'S PRIDE ULTRA MAN MAX DAILY MULTI PREMIUM PERFORMANCE FORMULA FOR MEN HIGH POTENCY TIMED  
RELEASE

SOURCE NATURALS LIFE FORCE MULTIPLE

SPRING VALLEY DAILY VITAMIN PACK ACTIVE WOMEN PACKETS

SWANSON PREMIUM BRAND GREEN TEA 500 MG

THE HEALTHY LIFE SUPPLEMENTS PAGG DAYTIME POLICOSANOL, ALPHA LIPOIC ACID, GARLIC BULB, GREEN TEA EXTRACT 1200 MG..

THE VITAMIN SHOPPE ULTIMATE MAN HIGH POTENCY MULTIVITAMIN MULTIMINERAL

THE VITAMIN SHOPPE ULTIMATE WOMAN HIGH POTENCY MULTIVITAMIN MULTIMINERAL

TRUNATURE RESVERATROL PLUS 250 MG STANDARDIZED TRANS-RESVERATROL WITH RED WINE EXTRACT, GRAPE SEED EXTRACT, AND ..

ULTALIFE ADVANCED BLOOD PRESSURE SUPPORT CONTAINS GARLIC, HIBISCUS, FORSLEAN & HAWTHORNE BERRY FAST ACTING FORMULA

USANA CELLSENTIALS VITA-ANTIOXIDANT

VIBRANT HEALTH GREEN VIBRANCE PLANT-BASED ADVANCED DAILY SUPERFOOD +25 BILLION PROBIOTICS CLINICALLY FORMULATED ..

VIBRANT HEALTH MAXIMUM VIBRANCE CONTAINS ALL KNOWN NUTRIENTS PLANT-BASED MULTI CLINICALLY FORMULATED VERSION 3..

VIBRANT HEALTH MAXIMUM VIBRANCE CONTAINS ALL KNOWN NUTRIENTS PLANT-BASED MULTI- ADVANCED DAILY FUTUREFOOD CLINIC..

VITALABS LIFE'S VITALITY MULTI-VITAMIN / MINERAL COMPLEX

VITAMIN WORLD ULTRA MAN MAX DAILY MULTI HIGH POTENCY PREMIUM PERFORMANCE FORMULA FOR MEN TIMED RELEASE

WEST MARTIN NUTRIGENOMICS TELOVITE MULTIVITAMIN

ZENITH LABS LONGEVITY ACTIVATOR WITH RESVERATROL DOCTOR FORMULATED

#### GARCINIA CAMBOGIA

BODYDYNAMIX SLIMVANCE CORE SLIMMING COMPLEX THERMOGENIC

DEFAULT GARCINIA CAMBOGIA

EVLUTION NUTRITION LEANMODE STIMULANT FREE FAT BURNER

GNC MEGA MEN ENERGY & METABOLISM VITAPAK PROGRAM WITH CLINICALLY STUDIED MULTIVITAMIN BLEND

GNC SUPERFOODS APPLE CIDER VINEGAR COMPLETE FORMULA WITH CAYENNE, GINGER AND GARCINIA CAMBOGIA

NUTRAHEALTH GARCINIA CAMBOGIA PLUS ADVANCED NATURAL WEIGHT LOSS FORMULA CONTAINS 95% HCA

NUTRILITE GLUCOSE HEALTH WITH CHROMIUM PICOLINATE 1 CAPSULE, 3X A DAY

ON OPTI-WOMEN HIGH-POTENCY 40+ INGREDIENTS

PARADISE GARCINIA CAMBOGIA 50% HCA

PURELY INSPIRED 100% PURE GARCINIA CAMBOGIA+ WITH GREEN COFFEE

QUALITY ENCAPSULATIONS GARCINIA CAMBOGIA STANDARDIZED TO 60% HCA EXTRA STRONG

SPRING VALLEY GARCINIA CAMBOGIA STANDARDIZED TO 60% HCA

TOP SECRET NUTRITION GARCINIA CAMBOGIA + WHITE KIDNEY BEAN EXTRACT

#### BLACK COHOSH

DESIGNS FOR HEALTH FEMGUARD + BALANCE

ESTROVEN

ESTROVEN MAXIMUM STRENGTH + ENERGY DRUG FREE & ESTROGEN FREE

ESTROVEN MENOPAUSE RELIEF +MOOD ONCE DAILY CAPLETS

ESTROVEN STRESS PLUS MOOD & MEMORY

NATURE'S BOUNTY BLACK COHOSH 540 MG WHOLE HERB



NATURE'S WAY BLACK COHOSH ROOT 540 MG PER SERVING  
REMIFEMIN ESTROGEN-FREE  
SPRING VALLEY BLACK COHOSH 40 MG PER SERVING  
SWANSON PREMIUM BRAND BLACK COHOSH 540 MG  
VITANICA CRAMP BARK EXTRA FORMULATED BY DR. TORI HUDSON

#### RED YEAST RICE

AMAZING NUTRITION AMAZING FORMULAS RED YEAST RICE 1200 MG PER SERVING  
BOTANIC CHOICE RED YEAST RICE PLUS 635 MG.  
NATURE'S BOUNTY RED YEAST RICE 600 MG US LAB TESTED PREMIUM FORMULA  
NOW RED OMEGA RED YEAST RICE 600 MG WITH COQ10 30 MG PLUS MILK THISTLE & ALPHA LIPOIC ACID  
NOW RED OMEGA RED YEAST RICE WITH COQ10 - 30 MG & OMEGA-3 FISH OIL  
PIPINGROCK.COM COQ-10 PLUS RED YEAST RICE WITH ALPHA LIPOIC ACID  
RED-Q10 A RED YEAST RICE FORMULA  
RX VITAMINS NATURLO CHOLESTEROL RED YEAST RICE AND PLANT STEROL BLEND  
SPRING VALLEY RED YEAST RICE 600 MG PER CAPSULE  
WEIDER RED YEAST RICE PLUS 1200 MG RED YEAST RICE PER 2 TABLETS

#### ASHWAGANDHA

ALLMAX TESTOFX  
BLUE STAR NUTRACEUTICALS GH PEAK  
BLUE STAR NUTRACEUTICALS STATUS  
DEFAULT ASHWAGANDHA  
DOTERRA MITO2MAX ENERGY & STAMINA COMPLEX  
EMERITT SERENITY  
GAIA HERBS SINGLE HERBS ASHWAGANDHA ROOT  
LIFE EXTENSION COGNITEX WITH PREGNENOLONE & BRAIN SHIELD (GASTRODIN)  
MEGAFOOD WOMEN'S ONE DAILY MULTIVITAMIN & MINERAL  
NATROGIX PRIME MIND BRAIN HEALTH FORMULA  
NATURE'S BOUNTY ANXIETY & STRESS RELIEF ASHWAGANDHA KSM-66 CLINICALLY STUDIED INGREDIENTS  
NUGENIX MAXX TESTOSTERONE  
OLYMPUS LABS SUPERCHARGED PCT KINGS BLOOD  
PURE ENCAPSULATIONS ASHWAGANDHA  
PURE ESSENCE STRESS SUPPORT SYSTEM  
REDCON1 BOOM STICK  
RESTORATIVE FORMULATIONS THYROCARE  
SCULPTNATION TESTBOOST EXTRA STRENGTH WITH: HORNY GOAT WEED ASHWAGANDHA GINSENG  
SIGNAL//OS  
TATTVA'S HERBS ASHWAGANDHA MADE WITH CERTIFIED ORGANIC HERBS

VEDIC CARE 100% ASHWAGANDHA POWDER WITHANIA SOMNIFERA PLANT PART USED: LEAF  
VITAMIN WORLD ASHWAGANDHA EXTRACT 500 MG STANDARDIZED TO CONTAIN 1.5% WITHANOLIDES STANDARDIZED EXTRACT

VITANICA ADRENAL ASSIST FORMULATED BY DR. TORI HUDSON VEGAN  
WEIDER PRIME HEALTHY TESTOSTERONE SUPPORT FOR MEN CLINICALLY TESTED INGREDIENTS ASHWAGANDHA (KSM-66) AND

YOUTHEORY ASHWAGANDHA 1,000 MG

ZENITH LABS LONGEVITY ACTIVATOR WITH RESVERATROL DOCTOR FORMULATED

#### OTHER BOTANICALS

21ST CENTURY STANDARDIZED HORSE CHESTNUT EXTRACT

365 LIQUID SUPER B12 B COMPLEX ALCOHOL FREE FORMULA 100% DAILY VALUE OR MORE OF SEVEN B VITAMINS

ADVOCARE CRAVE CHECK S.R. VITAMIN AND HERBAL SUSTAINED RELEASE

AKESO MIGRELIEF ORIGINAL FORMULA TRIPLE THERAPY WITH PURACOL

ALFA VITAMINS NATURAL ALFA 369 OMEGA 369 FLAX OIL 1000 MG ORGANIC

AMAZING HERBS BLACK SEED 100% PURE COLD-PRESSED BLACK CUMIN SEED OIL 500 MG CONTAINS MIN. 0.95% THYMOQUINONE 5X-TQ PREMIUM

AMAZING HERBS BLACK SEED 100% PURE COLD-PRESSED BLACK CUMIN SEED OIL CONTAINS MINIMUM OF 0.95% THYMOQUINONE (TQ) 5X-TQ (TQ) THYMOQUINONE MAXIMUM NATURALLY OCCURRING SOURCE

AMERICAN HEALTH ROYAL BRITTANY EVENING PRIMROSE OIL 500 MG 45 MG GLA (9%) 100% PURE SOLVENT FREE

AMERMED MAGNOLIA BARK EXTRACT 4:1

BIO3 SLIM BODY WEIGHT CONTROL TEA CONTAINING ALL-NATURAL HERBS CASSIA, MALLOW AND SAGE.

BODY WISE RIGHT CHOICE PM CHEALTED MINERALS | PHYTONUTRIENTS | ENZYMES

CASSANOVUM ORIGINAL CASSAVA ROOT EXTRACT & FOLIC ACID

CINNAMON 500 MG

COMPLETE ACTIVE MULTIVITAMIN FOR ACTIVE MEN

CRANBERRY 500 MG

CRAZYBULK TESTO-MAX

CTD SPORTS MULTI ELITE WHOLE FOOD MULTIVITAMIN FRUITS & VEGGIES

CVS HEALTH CINNAMON 1000 MG PER SERVING

CVS HEALTH CRANBERRY 4200 MG EQUIVALENT PER SOFTGEL

CVS HEALTH MILK THISTLE 175 MG STANDARDIZED EXTRACT

CVS HEALTH SAW PALMETTO 450 MG WHOLE HERB

DABUR PUDIN HARA PEARLS HERBAL MINT OILS CAPSULES

DEFAULT BARLEY GRASS CAPSULES

DEFAULT CINNAMON

DEFAULT CRANBERRY

DEFAULT CRANBERRY PLUS VITAMIN C

DEFAULT ECHINACEA

DEFAULT ECHINACEA LIQUID

DEFAULT ELDERBERRY

DEFAULT EVENING PRIMROSE OIL

DEFAULT FLAX SEED OIL

DEFAULT GARLIC

DEFAULT GINKGO BILOBA  
DEFAULT GINSENG  
DEFAULT MACA ROOT  
DEFAULT MILK THISTLE  
DEFAULT NETTLE  
DEFAULT RHODIOLA ROSEA  
DEFAULT SAW PALMETTO  
DEFAULT TRIBULUS TERRESTRIS POWDER  
DEFAULT VALERIAN ROOT  
DH DESERT HARVEST SUPER-STRENGTH FREEZE-DRIED ALOE VERA  
DIETWORKS GREEN COFFEE BEAN EXTRACT STANDARDIZED TO 45% CHLOROGENIC ACID WEIGHT MANAGEMENT  
FORMULA MADE WITH SVETOL  
DR. DAVID WILLIAMS PROBIOTIC ADVANTAGE COLON HEALTH EXTRA STRENGTH 10 BILLION LIVE PROBIOTICS  
ECLECTIC INSTITUTE RAW FRESH FREEZE-DRIED NETTLE ROOT 300 MG  
EMERALD EUROPEAN GINKGO BILOBA 24% GINGKGOFLAVONOGLYCOSIDES 6% TERPENE LACTONES  
EMSQUARED HOPE IMMUNALOE ALOE VERA ACEMANNAN  
EQUAZEN FAMILY TRIPLE STRENGTH EPA DHA GLA HIGHLY CONCENTRATED NATURALLY SOURCED OMEGA-3 WITH  
OMEGA-6 5 YEARS TO ADULT ONE-A-DAY CAPSULES  
ESSENTIAL BEING GINSENG 250 MG  
FINEST NUTRITION CINNAMON 1000 MG PER TWO CAPSULES  
FINEST NUTRITION CRANBERRY PLUS VITAMIN C 4200 MG PER SOFTGEL  
FINEST NUTRITION ECHINACEA 400 MG PER CAPSULE  
FINEST NUTRITION ODORLESS GARLIC 1000 MG PER SOFTGEL  
FOREVER GARLIC-THYME ODORLESS GARLIC PLUS THYME  
FRESH HEALTHCARE PURE PREMIUM MORINGA 1000 MG PER SERVING HIGH STRENGTH COMPLETE GREEN SUPERFOOD  
RICH SOURCE OF PHYTONUTRIENTS CONTAINS ESSENTIAL AMINO ACIDS SUITABLE FOR VEGETARIANS  
GARDEN OF LIFE MYKIND ORGANICS EXTRA STRENGTH TURMERIC WITH ORGANIC FERMENTED WHOLE TURMERIC &  
GINGER ORGANIC BLACK PEPPER & PROBIOTICS  
GARDEN OF LIFE VITAMIN CODE RAW ONE FOR WOMEN WHOLE FOOD  
GAT SPORT TESTROL ORIGINAL ORIGINAL FORMULA  
GNC HERBAL PLUS ASTRAGALUS 500 MG WHOLE HERB  
GNC HERBAL PLUS CAT'S CLAW BARK 500 MG WHOLE HERB  
GNC HERBAL PLUS ECHINACEA & GOLDENSEAL VEGETARIAN STANDARDIZED EXTRACT BLEND  
GNC HERBAL PLUS HORSE CHESTNUT EXTRACT 300 MG VEGETARIAN STANDARDIZED EXTRACT  
GNC HERBAL PLUS MACA ROOT 525 MG VEGETARIAN WHOLE HERB  
GNC MILK THISTLE STANDARDIZED HERB EXTRACT VEGETARIAN 200MG  
GNC PYCNOGENOL 50 MG  
GREENLEAF OPTIMUM HEALTH CHOLESTEROL SUPPORT  
HAMPSHIRE LABS, INC. THE ULTIMATE DIABETIC CIRCULATION BOOSTER  
HAVASU NUTRITION L-ARGININE EXTRA STRENGTH  
HELIOCARE CLINICALLY PROVEN FERNBLOCK PLE TECHNOLOGY  
HERBALFACTORS RHODIOLA STANDARIZED TO 3% SALIDROSIDES 150 MG NATURAL FACTORS  
HERBALIFE CELL ACTIVATOR FORMULA 3  
IBGARD INDIVIDUALLY TRIPLE-COATED, SUSTAINED-RELEASE MICROSPHERES OF ULTRAMEN, AN ULTRAPURIFIED  
PEPPERMINT OIL

IRON ADDICTS BRAND SLEEVE BUSTER PUMP FORMULA

IT WORKS! ADVANCED FORMULA FATFIGHTER WITH CARB INHIBITORS

JARROW FORMULAS ARTICHOKE STANDARDIZED EXTRACT 500 MILLIGRAMS

KIRKLAND SIGNATURE HAIR, SKIN & NAILS HIGH POTENCY BIOTIN 5000 MCG PLUS ANTIOXIDANTS VITAMIN A & C - CALCIUM - VITAMIN D3 WITH KERATIN

KYOLIC AGED GARLIC EXTRACT ORIGINAL FORMULA FORMULA 100 ODORLESS ORGANIC GARLIC

LIFE EXTENSION BLUEBERRY EXTRACT WITH POMEGRANATE FULL-SPECTRUM FOOD-BASED POLYPHENOLS

LIFE EXTENSION OMEGA FOUNDATIONS SUPER OMEGA-3 EPA/DHA WITH SESAME LIGNANS & OLIVE EXTRACT SMALL, EASY-TO-SWALLOW SOFTGELS

LITTLE REMEDIES FAST ACTING GRIPE WATER NEWBORN+

MAX EFFORT MUSCLE ME PRE WORKOUT

MAXIMUM STRENGTH VIGOR THRIVE MALE ENHANCEMENT COMPLEX NEW IMPROVED FORMULA

MAXIVISION EYE VITAMIN & MULTIVITAMIN WHOLE BODY FORMULA AREDS2 BASED 2X LUTEIN & ZEAXANTHIN 20 MG LUTEIN + 4 MG ZEAXANTHIN PLUS PROPRIETARY BLEND

MEGAFOOD BALANCED B COMPLEX WITH KALE, BROCCOLI & BROWN RICE MULTIVITAMIN FOXY ORGANIC

MEGAFOOD BLOOD BUILDER MINIS WITH BEETS, ORANGES & BROCCOLI IRON & MULTIVITAMIN

MEGAFOOD MEGAFLOA FOR WOMEN 50 BILLION ACTIVE CULTURES WITH CRANBERRY & PREBIOTIC FOODS PROBIOTIC

MEMBER'S MARK CLINICAL STRENGTH CRANBERRY CAPSULES, 500 MG MADE WITH 100% NATURAL WHOLE CRANBERRIES

MEMBER'S MARK EASY TO SWALLOW VITAMIN C 1000 MG WITH ZINC NATURAL ROSE HIPS AND CITRUS BIOFLAVONOIDS

MEMBER'S MARK HIGH ABSORPTION TURMERIC CURCUMIN COMPLEX WITH STANDARDIZED EXTRACT CAPSULES, 500 MG VEGETARIAN CAPSULE

MEMBER'S MARK STANDARDIZED EXTRACT GINKGO BILOBA SOFTGELS, 120 MG

MEMBER'S MARK VITAMIN C WITH NATURAL ROSE HIPS TABLETS, 1000 MG

MORTAR AND PESTLE HERBS OIL OF OREGANO MADE WITH ORGANIC OREGANO

NATROL B-COMPLEX FAST DISSOLVE CONTAINS ALL B VITAMINS VEGETARIAN

NATURAL MENTE BIO-CELL STEM-CELL COMPLEX ALL NATURAL

NATURE MADE FLAXSEED OIL MADE WITH ORGANIC FLAXSEED OIL 1000 MG

NATURE MADE WHOLE HERB ECHINACEA (PURPUREA) 350 MG AERIAL PART

NATURE'S BLEND ECHINACEA 350 MG AND GOLDEN SEAL 100 MG

NATURE'S BOUNTY CINNAMON 1000 MG PER SERVING

NATURE'S BOUNTY CRANBERRY FRUIT 4200 MG EQUIVALENT PER SOFTGEL | WITH VITAMIN C

NATURE'S BOUNTY CRANBERRY FRUIT CONCENTRATE 25,200 MG EQUIVALENT PER SERVING WITH VITAMIN C

NATURE'S BOUNTY DOUBLE STRENGTH STANDARDIZED EXTRACT GINKGO BILOBA 120 MG STANDARDIZED TO CONTAIN 24% GINKGO FLAVONE GLYCOSIDES

NATURE'S BOUNTY ECHINACEA 400 MG | WHOLE HERB

NATURE'S BOUNTY FLAXSEED OIL 1200 MG | 540 MG OF OMEGA-3

NATURE'S BOUNTY GARLIC 2000 MG EQUIVALENT PER TABLET

NATURE'S BOUNTY GARLIC EXTRACT 1000 MG EQUIVALENT

NATURE'S BOUNTY GINGER ROOT 550 MG | WHOLE HERB

NATURE'S BOUNTY GINKGO BILOBA 60 MG PER SERVING | STANDARDIZED TO CONTAIN 24% GINKGO FLAVONE GLYCOSIDES

NATURE'S BOUNTY GINSENG COMPLEX

NATURE'S BOUNTY MILK THISTLE 175 MG | STANDARDIZED EXTRACT

NATURE'S BOUNTY ODORLESS GARLIC AND PARSLEY

NATURE'S BOUNTY SAW PALMETTO 450 MG | WHOLE HERB

NATURE'S LIFE ALFALFA LEAF 1,000 MG MEDICAGO SATIVA 2 DAILY  
NATURE'S MEASURE GINKGO BILOBA 4:1 EXTRACT  
NATURE'S MEASURE GINSENG 250 MG  
NATURE'S MEASURE ODOR CONTROLLED GARLIC 1000 MG  
NATURE'S PLUS HEMA-PLEX CAPSULES IRON WITH SYNERGISTIC COFACTORS 85 MG ELEMENTAL IRON MILD AND GENTLE FAST-ACTING VEGAN  
NATURE'S PLUS HERBAL ACTIVES NUTRIZAC 300 MG ST. JOHN'S WORT STANDARDIZED BOTANICAL NOW WITH METHYLCOBALAMIN!  
NATURE'S PLUS SOURCE OF LIFE MULTI-VITAMIN & MINERAL WITH WHOLE FOOD CONCENTRATES TABLETS VEGETARIAN  
NATURE'S SECRET 15-DAY WEIGHT LOSS SUPPORT CLEANSE & FLUSH  
NATURE'S SUNSHINE GARLIC  
NATURE'S SUNSHINE HAWTHORN BERRIES  
NATURE'S SUNSHINE SAW PALMETTO  
NATURE'S SUNSHINE ST. JOHN'S WORT CONCENTRATED  
NATURE'S TRUTH VITAMINS GINKGO BILOBA STANDARDIZED EXTRACT 120 MG PLUS BACOPA EXTRACT  
NATURE'S TRUTH VITAMINS TURMERIC CURCUMIN COMPLEX 500 MG PLUS BLACK PEPPER EXTRACT  
NATURE'S WAY FORTIFY AGE 50+ PROBIOTIC +PREBIOTICS EVERYDAY CARE 30 BILLION LIVE PROBIOTIC CULTURES PER CAPSULE 11 PROBIOTIC STRAINS PROBIOTIC  
NATURE'S WAY HYSSOP HERB 900 MG PER SERVING  
NATURE'S WAY PREMIUM EXTRACT ASTRAGALUS 0.5% ASTRAGALOSIDES  
NATURE'S WAY SARSAPARILLA ROOT 425 MG  
NATURE'S WAY STANDARDIZED GRAPE SEED 95% POLYPHENOLS  
NATURE'S WAY STANDARDIZED MILK THISTLE 80% SILYMARIN  
NATURE'S WAY STANDARDIZED OLIVE LEAF 20% OLEUROPEIN  
NATURE'S WAY STANDARDIZED OREGANO OIL 75-85% CARVACROL  
NATURE'S WAY THISILYN STANDARDIZED MILK THISTLE EXTRACT MAXIMUM ABSORPTION LIVER SUPPORT FORMULA STANDARDIZED TO 80% SILYMARIN VEGETARIAN  
NATURE'S WAY VITEX FRUIT 400 MG  
NATURELO ONE DAILY MULTIVITAMIN FOR WOMEN  
NOW ADAM SOFTGELS SUPERIOR MEN'S MULTI WITH SAW PALMETTO, PLANT STEROLS, LYCOPENE & COQ10  
NOW GARLIC OIL 1500 MG EQUIVALENT TO WHOLE CLOVE GARLIC  
NOW GINGER ROOT 550 MG VEGETARIAN/VEGAN  
NOW HORNY GOAT WEED EXTRACT 750 MG SUITABLE FOR MEN AND WOMEN PLUS 150 MG OF MACA ROOT VEGETARIAN/VEGAN NON-GMO  
NOW OLIVE LEAF EXTRACT 500 MG STANDARDIZED 6% OLEUROPEIN  
NOW SAW PALMETTO EXTRACT WITH PUMPKIN SEED OIL AND ZINC  
NOW SPORTS TRIBULUS 1,000 MG STANDARDIZED EXTRACT MINIMUM 45% SAPONINS VEGETARIAN/VEGAN NON-GMO  
NOW VITAMIN K-2 100 MCG BIOLOGICALLY ACTIVE FORM MENAQUINONE-4 (MK-4) VEGETARIAN/VEGAN NON-GMO  
NUGENIX TESTOSTERONE MULTIVITAMIN MEN'S DAILY TESTOSTERONE MULTIVITAMIN  
NUSAPURE FRENCH MARITIME PINE BARK EXTRACT 300 MG PER SERVING  
NUTRIBIOTIC VEGAN GSE GRAPEFRUIT SEED EXTRACT LIQUID CONCENTRATE UNFILTERED FORMULA!  
NUTRICOST BITTER MELON MOMORDICA CHARANTIA 600MG EXTRACT PER SERVING  
NUTRIFLAIR CEYLON CINNAMON MADE WITH ORGANIC CEYLON CINNAMON 1200 MG PER SERVING  
NUTRILITE CLEARGUARD 2 TABLETS, 3X A DAY  
NUTRILITE COMPLEX FOR HAIR, SKIN AND NAILS

NUTRILITE DOUBLE X 22 VITAMINS AND MINERALS AND 20 PLANT CONCENTRATES 3 TABLETS, 2X A DAY  
NUTRILITE HAIR, SKIN & NAIL HEALTH CONTAINS BIOTIN AND COLLAGEN 1 TABLET, 1X A DAY  
NUTRILITE HEART HEALTH COQ10 1-3 SOFTGELS, 1X A DAY  
NUTRILITE IRON FOLIC 1 TABLET, 1-3X A DAY  
NUTRILITE JOINT HEALTH GLUCOSAMINE AND CHONDROITIN 2 TABLETS, 2X A DAY  
NUTRILITE MEMORY BUILDER CISTANCHE 2 TABLETS, 1X A DAY  
NUTRILITE MEN'S PACK CONVENIENT DAILY VITAMIN AND MINERAL NUTRITION FOR MEN 1 PACKET A DAY  
NUTRILITE PERFECT PACK WITH 22 VITAMINS AND MINERALS, AND 22 PLANT CONCENTRATES INCLUDES DOUBLE X 2 PACKETS A DAY  
NUTRILITE PROSTATE HEALTH NATURAL SUPPORT WITH SAW PALMETTO AND NETTLE ROOT 1 SOFTGEL, 3X A DAY  
NUTRILITE VITAMIN B DUAL-ACTION B VITAMINS 1 TABLET, 1X A DAY  
NUTRILITE WOMEN'S PACK CONVENIENT DAILY VITAMIN AND MINERAL NUTRITION FOR WOMEN 1 PACKET A DAY  
OREGON'S WILD HARVEST CHASTE TREE MADE WITH ORGANIC CHASTE TREE  
OREGON'S WILD HARVEST KELP NATURAL SOURCE OF IODINE  
ORGANIC INDIA NEEM CERTIFIED ORGANIC  
OXYLENT DRINK OXYLENT BREATHE LIFE 5-IN-1 MULTIVITAMIN DRINK DAILY ESSENTIAL NUTRIENTS PACKETS  
PHARMA SERIES BETALEAN-SCA ANSI  
PLEXUS PROBIO 5  
PRIMAL LABS CARDIORELAX AO  
PROSA NOPAL (OPUNTIA FICUS INDICA) 400 MG  
PURITAN'S PRIDE BILBERRY EXTRACT 60 MG STANDARDIZED TO CONTAIN 25% ANTHOCYANOSIDES STANDARDIZED EXTRACT  
PURITAN'S PRIDE EXTRA STRENGTH PROSTA-METTO SAW PALMETTO COMPLEX STANDARDIZED EXTRACT FLOW GUARD  
PURITAN'S PRIDE GRAPSEED EXTRACT 100 MG STANDARDIZED FOR POLYPHENOLS  
PURITAN'S PRIDE NATURAL FLAX OIL 1000 MG OMEGA-3, 6 & 9 COLD PRESSED  
PURITAN'S PRIDE PREMIUM ECHINACEA 400 MG NATURAL WHOLE HERB  
PURITAN'S PRIDE PREMIUM ODORLESS GARLIC 500 MG GARLIC FRESH  
PURITAN'S PRIDE SAW PALMETTO STANDARDIZED TO CONTAIN 85-95% FATTY ACIDS & STEROLS 160 MG STANDARDIZED EXTRACT  
PURITY PRODUCTS ASTAFAX ASTAREAL ASTAXANTHIN MIXED TOCOTRIENOLS BIOPERINE  
PURITY PRODUCTS B-12 ENERGY BERRY LEMONADE MELT WITH VITAMIN B6, FOLIC ACID, VITAMIN D  
PURITY PRODUCTS B-12 ENERGY BERRY MELT WITH VITAMIN B6, FOLIC ACID, VITAMIN D  
PURITY PRODUCTS EVERSTRONG CREAPURE CREATINE COFFEEBERRY - VITAMIN D FRUITEX-B PHYTOBORON  
QUANTUM HEALTH SUPER LYSINE+ WITH VITAMIN C, ECHINACEA, LICORICE, PROPOLIS, ODORLESS GARLIC  
REAL HEALTH THE PROSTATE FORMULA WITH SAW PALMETTO ADVANCED FORMULATION NOW WITH VITAMIN D & GINGER!  
RENEW LIFE WOMEN'S DAILY 2-IN-1 PREBIOTICS + PROBIOTICS 20 BILLION LIVE CULTURES 10 PROBIOTIC STRAINS PROBIOTIC  
REXALL CONCENTRATED CRANBERRY FRUIT 4200 MG EQUIVALENT PER SOFTGEL PLUS VITAMIN C  
REXALL ELDERBERRY SAMBUCUS 1250 MG EQUIVALENT JUICE CONCENTRATE  
REXALL NATURALIST ODORLESS GARLIC EXTRACT 1000 MG EQUIVALENT PER SOFTGEL  
REXALL ODORLESS GARLIC 500 MG  
REXALL STANDARDIZED EXTRACT GINKGO BILOBA 120 MG  
REXALL STANDARDIZED EXTRACT KOREAN GINSENG 100 MG  
RITE AID PHARMACY ECHINACEA 380 MG

SANAR NATURALS COLLAGEN WRINKLE FORMULA  
SAW PALMETTO 160 MG EUROPEAN STANDARDIZED STANDARDIZED TO 85%-95% [136-152 MG PER CAPSULE] FATTY ACIDS AND STEROLS  
SHAKLEE +GREENS ALFALFA COMPLEX ULTRA-PURE, PREMIUM ALFALFA & SPEARMINT  
SHOT-B GINSENG 40.0 MULTIVITAMIN AND GINSENG EXTRACT  
SIMPLY RIGHT NATURAL ROSE HIPS VITAMIN C 1000 MG HIGH POTENCY WITH BIOFLAVONOIDS  
SMOKY MOUNTAIN NATURALS DIM 200 MG + BIOPERINE EXTRA STRENGTH FORMULA  
SOLARAY BAMBOO STEM EXTRACT 300 MG PER CAPSULE BAMBUSA VULGARIS 70% SILICA  
SOLARAY DEVIL'S CLAW HARPAGOPHYTUM SPP. 525 MG PER CAPSULE WHOLE ROOT  
SOLARAY GARLIC ALLIUM SATIVUM 500 MG PER CAPSULE  
SOLARAY MANGOSTEEN GARCINIA MANGOSTANA 475 MG PER CAPSULE WHOLE FRUIT  
SOLARAY PASSION FLOWER 350 MG PER CAPSULE WHOLE AERIAL PASSIFLORA INCARNATA  
SOLARAY TWO-STAGE, TIMED-RELEASE SUPER BIO C BUFFERED FAST-ACTING FIRST STAGE TIMED-RELEASE SECOND STAGE  
SOLARAY VITEX 400 MG PER CAPSULE WHOLE BERRY VITEX ANGUS-CASTUS  
SOURCE NATURALS WELLNESS FORMULA HERBAL DEFENSE COMPLEX TABLETS  
SPRING VALLEY BILBERRY EXTRACT 150 MG PER CAPSULE MADE WITH 150 MG ORGANIC BILBERRY EXTRACT, 100 MG ORGANIC BLUEBERRY EXTRACT, AND 6 MG ORGANIC LUTEIN WITH BILBERRY, LUTEIN AND BLUEBERRY  
SPRING VALLEY C 500 MG WITH ROSE HIPS  
SPRING VALLEY CINNAMON 1000 MG PER SERVING 2 PER DAY  
SPRING VALLEY CINNAMON 500 MG PER CAPSULE PLUS CHROMIUM  
SPRING VALLEY COLD-PRESSED FLAXSEED OIL 1000 MG PER SOFTGEL 450 MG OMEGA-3  
SPRING VALLEY CONCENTRATED ALOE VERA GEL  
SPRING VALLEY CONCENTRATED EXTRACT ACAI  
SPRING VALLEY CONCENTRATED ODOR-CONTROLLED GARLIC 1,000 MG PER SOFTGEL  
SPRING VALLEY CONCENTRATED ODOR-CONTROLLED GARLIC 1000 MG  
SPRING VALLEY ECHINACEA  
SPRING VALLEY ECHINACEA 760 MG PER SERVING MADE WITH ORGANIC ECHINACEA POWDER  
SPRING VALLEY EXTRA STRENGTH HAIR, SKIN & NAILS 5000 MCG BIOTIN PER SERVING WITH ARGAN OIL, COCONUT OIL, AND COLLAGEN  
SPRING VALLEY FENUGREEK 610 MG PER CAPSULE MADE WITH ORGANIC FENUGREEK SEED POWDER  
SPRING VALLEY GINKGO BILOBA EXTRACT 120 MG PER CAPSULE  
SPRING VALLEY HAWTHORN BERRIES 565 MG PER CAPSULE MADE WITH ORGANIC HAWTHORN BERRY POWDER  
SPRING VALLEY STANDARDIZED EXTRACT CRANBERRY 84 MG PER SOFTGEL  
SPRING VALLEY STANDARDIZED EXTRACT GINKGO BILOBA 60 MG PER TABLET  
SPRING VALLEY STANDARDIZED EXTRACT KOREAN PANAX GINSENG 100 MG PER CAPSULE  
SPRING VALLEY STANDARDIZED EXTRACT MILK THISTLE 175 MG PER CAPSULE  
SPRING VALLEY STANDARDIZED EXTRACT SAW PALMETTO 160 MG PER SOFTGEL  
SPRING VALLEY STANDARDIZED EXTRACT ST. JOHN'S WORT 150 MG PER CAPSULE  
SPRING VALLEY TART CHERRY EXTRACT 1200 MG PER CAPSULE MADE WITH ORGANIC TART CHERRY EXTRACT  
SPRING VALLEY ULTRA TRIPLE STRENGTH CRANBERRY 15,000 MG EQUIVALENT PER CAPSULE  
SPRING VALLEY VALERIAN ROOT 500 MG PER SERVING MADE WITH ORGANIC VALERIAN ROOT  
SPRING VALLEY WHOLE HERB GINGER ROOT 550 MG PER CAPSULE  
SPRING VALLEY WHOLE HERB SAW PALMETTO 450 MG PER CAPSULE  
SPRING VALLEY WOMEN'S PROBIOTIC 1 BILLION ACTIVE CULTURES PER CAPSULE WITH CRANBERRY EXTRACT

SPROUTS FARMERS MARKET 100% VEGETARIAN OREGANO OIL CARVACROL 70  
SPROUTS FARMERS MARKET ST. JOHN'S WORT  
SUNDOWN NATURALS CINNAMON 1000 MG PER SERVING  
SUNDOWN NATURALS STANDARDIZED MILK THISTLE 240 MG PER SERVING  
SUNDOWN NATURALS WHOLE HERB SAW PALMETTO 450 MG  
SUPERIOR SOURCE NO SHOT CYANOCOBALAMIN B-12 1000 MCG B-6 & FOLIC ACID 400 MCG  
SWANSON GRAPE SEED EXTRACT 200 MG PER CAPSULE  
SWANSON PREMIUM BRAND PSYLLIUM HUSKS 610 MG  
SWANSON PROBIOTICS PRUNE REGULARITY COMPLEX WITH PROBIOTICS & FOS 5 BILLION CFU  
SWANSON ULTRA JOINT CARE WITH GLUCOSAMINE, MSM & CHONDROITIN  
SWANSON ULTRA SUPER STRENGTH CRANBERRY WHOLE FRUIT CONCENTRATE  
TERRY NATURALLY SAGAPRO BLADDER HEALTH FOR MEN AND WOMEN ANGELICA CLINICALLY STUDIED  
TESTMAX CYCLE 45 DOUBLE DOSE FORMULA FOR MEN  
TESTOGEN  
TESTOMENIX  
THE PEOPLE'S CHEMIST IMMUNE FX  
THE VITAMIN SHOPPE CINNAMON EXTRACT 500 MG  
THE VITAMIN SHOPPE CRANBERRY ACTION + VITAMIN C  
THE VITAMIN SHOPPE ECHINACEA ECHINACEA PURPUREA 400 MG HERB  
THE VITAMIN SHOPPE FENUGREEK SEED A TRADITIONAL HERB 610 MG  
THE VITAMIN SHOPPE MILK THISTLE EXTRACT 70 MG 80% SILYMARIN  
THERALOGIX THERACRAN ONE CRANBERRY STANDARDIZED TO CONTAIN 36 MG OF CRANBERRY PACS PER CAPSULE  
TOTAL CHELATE NUTRI-WEST  
TRADER JOE'S B-6 / FOLIC ACID / B-12 UNDER THE TONGUE HIGH POTENCY  
TRADER JOE'S SYNERGISTIC C VITAMIN C COMPLEX 500 MG PER TABLET WITH LEMON BIOFLAVONOID COMPLEX AND RUTIN BIOFLAVONOIDS  
TRADITIONAL MEDICINALS ORGANIC ECHINACEA PLUS ORIGINAL WITH SPEARMINT CAFFEINE FREE  
TRADITIONAL MEDICINALS ORGANIC THROAT COAT ORIGINAL WITH SLIPPERY ELM CAFFEINE FREE  
TRUNATURE ADVANCED STRENGTH CINSULIN WATER EXTRACT OF CINNAMON CINNAMON CONCENTRATE 10:1 STRENGTH 2 CAPSULES DELIVER 500 MG CINNAMON EXTRACT PLUS 400 MCG CHROMIUM AND 12.5 MCG (500 IU) VITAMIN D  
TRUNATURE ADVANCED STRENGTH CINSULIN WATER EXTRACT OF CINNAMON CINNAMON CONCENTRATE 10:1 STRENGTH 2 CAPSULES DELIVER 500 MG CINNAMON EXTRACT PLUS 400 MCG CHROMIUM AND 500 IU VITAMIN D3 VEGGIE CAPS!  
TRUNATURE CRANBERRY ANTIOXIDANT ACTIVITY WITH SHANSTAR CONCENTRATED EXTRACT 300 MG  
TRUNATURE GINKGO BILOBA 120 MG WITH VINPOCETINE STANDARDIZED HERBAL EXTRACT  
TRUNATURE GRAPE SEED & RESVERATROL ONE PER DAY TIMED-RELEASE FOR SUSTAINED ACTION PLUS BENEFITS OF WHOLE GRAPE WITH RESVERATROL 75 MG  
TRUNATURE PROSTATE PLUS HEALTH COMPLEX STANDARDIZED SAW PALMETTO WITH ZINC, LYCOPENE & PUMPKIN SEED CRAN-MAX CRANBERRY JUST 1 SOFTGEL PER DAY WITH CRAN-MAX CRANBERRY  
UNICITY ALOE VERA  
UNICITY RENEW FOR MEN  
VESELE  
VH ESSENTIALS PROBIOTICS WITH PREBIOTICS & CRANBERRY  
VITAMIN WORLD MORINGA MORINGA OLEIFERA 5000 MG CONCENTRATED HERB  
VITAMIN WORLD SAW PALMETTO 1000 MG 4:1 EXTRACT CONCENTRATED HERB



VYANTIXRX MALE ENHANCEMENT FORMULA

WALGREENS HAIR, SKIN AND NAILS FORMULA WITH BIOTIN & KERATIN TWO TABLETS PER DAY

WINK NATURALS PRE & PRO BIOTIC HUCKLEBERRY

YOUNG LIVING ESSENTIAL OILS PROSTATE HEALTH ESSENTIAL OILS

**eFigure. Herbal and Dietary Supplement Use Among U.S. Adults Enrolled in NHANES 2017-2020**

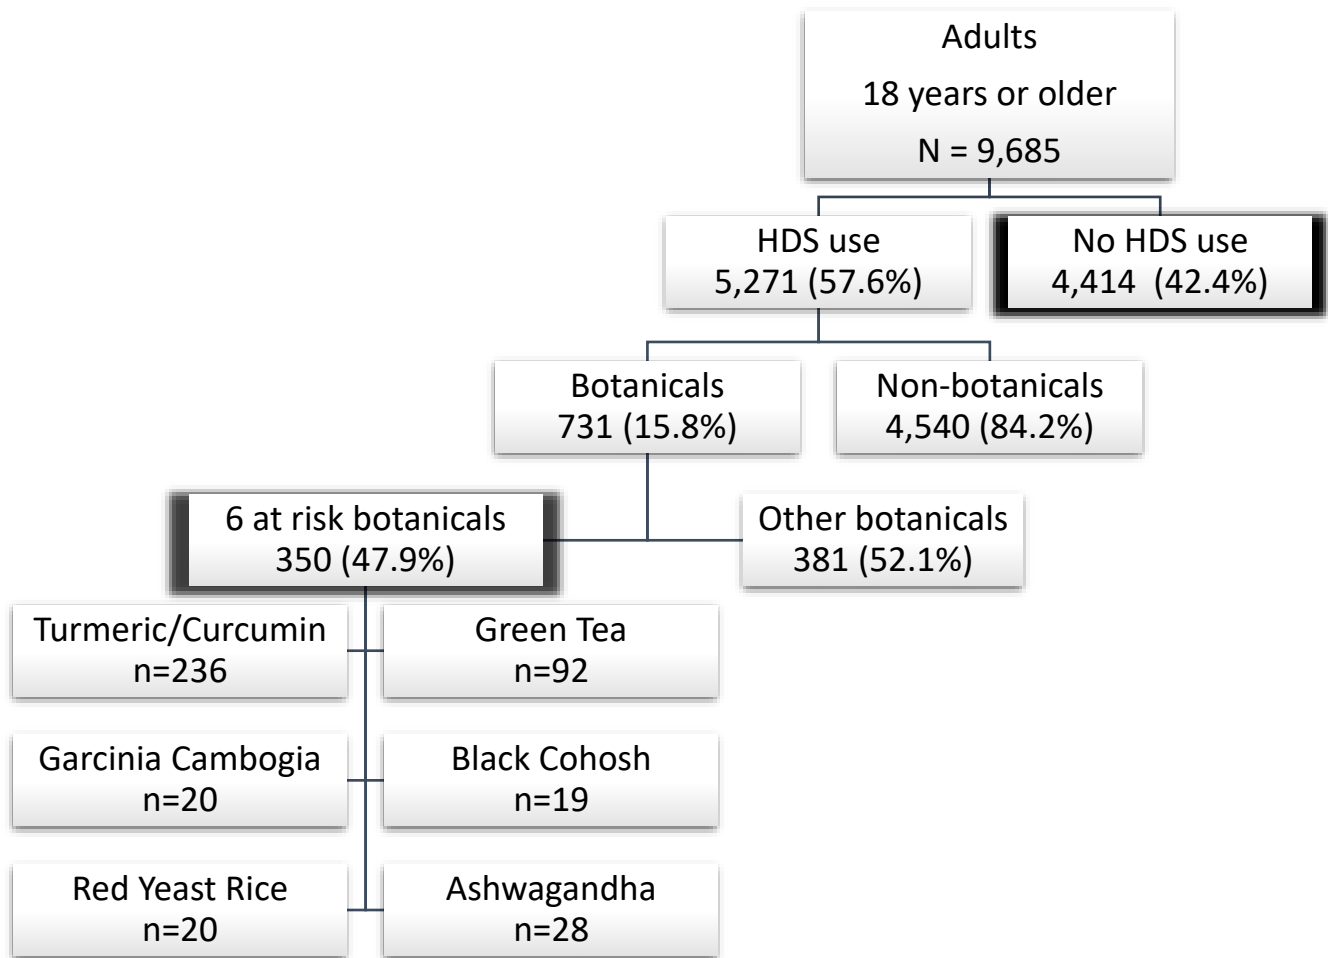

**eFigure 1 legend:** Amongst 9,685 adults enrolled in NHANES 2017-2020 cohort, 57.6% reported using at least 1 HDS product within the past 30 days. Amongst the 731 adults using botanicals, 350 participants (4.7%) used at least one of the 6 at risk botanical products
