# Supplementary material for: Estimated Exposure to 6 Potentially Hepatotoxic Botanicals in US Adults
Source: PubMed Central journal article supplement (PMC11301549; doi:10.1001/jamanetworkopen.2024.25822), 2024-08-05
Supplement: jamanetwopen-e2425822-s002.pdf [file jamanetwopen-e2425822-s002.pdf]

## Data Sharing Statement

Likhitsup. Estimated Exposure to 6 Potentially Hepatotoxic Botanicals in US Adults. *JAMA Netw Open*. Published August 05, 2024. doi:10.1001/jamanetworkopen.2024.25822

### Data

**Data available:** No

### Additional Information

**Explanation for why data not available:** NHANES data is available publicly via CDC website
